# Supplementary material
Source: publisher figshare collection journal article supplement (https://frontiersin.figshare.com/ndownloader/files/33960029)
Supplement: Supplementary file 1 [file 33960029]

**Supplementary File**

These are the ABC transporter genes that have been studied

| Gene Symbol | Gene description | Accession Number | Chr. Number | Gene ID |
| --- | --- | --- | --- | --- |
| LOC122604246 | ABC transporter G family member 39-like | JSWR01009869.1 | 6 | 122604246 |
| LOC122581077 | ABC transporter G family member 32-like | JSWR01001393.1 | 9 | 122581077 |
|  |  |  |  |  |

Raw data of Chromatin immunoprecipitation followed by qPCR

| Site No. | Site name | Native (N)/Non-native (NN) | MeDIP result | POLII | ACETAL |
| --- | --- | --- | --- | --- | --- |
| 1 | CLINTON | N | 4.71 | 0.308 | 0.0086 |
| 2 | BUTTE | N | 3.33 | 0.128 | 0.626 |
| 3 | LOLO | N | 6.88 | 0.296 | 1.057 |
| 4 | TURAH | N | 2.16 |  |  |
| 5 | CLARKE | N | 5.82 |  |  |
| 6 | KUBG 1 | NN | 0.746 | 5.8 | 0.876 |
| 7 | KANGAN | NN | 0.739 | 0.8 | 0.553 |
| 8 | GULMARG | NN | 0.11 | 1.206 | 0.001 |
| 9 | BUDGAM | NN | 0.16 |  |  |
| 10 | KUBG 2 | NN | 0.3 |  |  |
|  |  |  |  |  |  |

# MeDIP

| Site No. | Site name | Native (N)/Non-native (NN) | Average Ct Value | Input |  | MeDIP result |
| --- | --- | --- | --- | --- | --- | --- |
| 1 | CLINTON | N | 21.99 | 21.90 |  | 4.71 |
| 2 | BUTTE | N | 24.89 | 24.27 |  | 3.33 |
| 3 | LOLO | N | 22.78 | 23.27 |  | 6.88 |
| 4 | TURAH | N | 23.24 | 21.96 |  | 2.16 |
| 5 | CLARKE | N | 21.95 | 22.19 |  | 5.82 |
| 6 | KUBG 1 | NN | 23.26 | 20.35 |  | 0.746 |
| 7 | KANGAN | NN | 25.86 | 22.93 |  | 0.739 |
| 8 | GULMARG | NN | 28.91 | 23.07 |  | 0.11 |
| 9 | BUDGAM | NN | 25.84 | 20.58 |  | 0.16 |
| 10 | KUBG 2 | NN | 27.42 | 23.13 |  | 0.3 |

# AcetalChIP

| Site No. | Site name | Native (N)/Non-native (NN) | Average Ct Value | Input | ACETAL |
| --- | --- | --- | --- | --- | --- |
| 1 | CLINTON | N | 29.66 | 19.88 | 0.0086 |
| 2 | BUTTE | N | 24.61 | 22.48 | 0.626 |
| 3 | LOLO | N | 27.99 | 22.27 | 1.057 |
| 6 | KUBG 1 | NN | 26.07 | 23.40 | 0.876 |
| 7 | KANGAN | NN | 29.04 | 21.23 | 0.553 |
| 8 | GULMARG | NN | 32.24 | 21.23 | 0.001 |

# Pol II ChIP

| Site No. | Site name | Native (N)/Non-native (NN) | Average Ct Value | Input | Pol II |
| --- | --- | --- | --- | --- | --- |
| 1 | CLINTON | N | 24.96 | 20.69 | 0.308 |
| 2 | BUTTE | N | 26.5 | 20.89 | 0.128 |
| 3 | LOLO | N | 24.78 | 20.45 | 0.296 |
| 6 | KUBG1 | NN | 21.72 | 21.95 | 5.8 |
| 7 | KANGAN | NN | 25.64 | 22.84 | 0.8 |
| 8 | GULMARG | NN | 21.38 | 19.20 | 1.206 |
